# Supplementary material
Source: bioRxiv or medRxiv preprint supplement (https://www.biorxiv.org/content/biorxiv/early/2021/05/08/2021.05.07.443164.1/DC1/embed/media-1.pdf)
Supplement: Supplementary file [file media-1.pdf]

**Supplementary Table S1: Optimization strategies**

|                                                                                                                                  |                                                                       |
|----------------------------------------------------------------------------------------------------------------------------------|-----------------------------------------------------------------------|
| <b>Media types</b>                                                                                                               |                                                                       |
| PneumaCult ALI                                                                                                                   | StemCell 05001                                                        |
| B/D complete w/o hydrocortisone                                                                                                  | ScienCell custom order                                                |
| PneumaCult ALI w/o hydrocortisone                                                                                                | StemCell 05001                                                        |
| Vertex ALI medium                                                                                                                | Neuberger et al, 2011 <sup>1</sup>                                    |
| Airway organoid medium                                                                                                           | Sachs et al, 2019 <sup>2</sup>                                        |
| <b>Cell culture compounds</b>                                                                                                    |                                                                       |
| Retinoic acid                                                                                                                    | 15; 150; 1500 ng/ml; Sigma R2625                                      |
| Dexamethasone                                                                                                                    | 0.1; 1; 10 $\mu$ M; Sigma D4902                                       |
| <b>Inhibitors</b>                                                                                                                |                                                                       |
| <i>AG-1478</i><br>Epidermal growth factor receptor (EGFR) tyrosine kinase inhibitor                                              | 30; 150; 300 nM; Sigma T4182                                          |
| <i>PD098059</i><br>Mitogen-Activated Protein Kinase inhibitor                                                                    | 10 $\mu$ M; Sigma P215                                                |
| <i>Y-27632</i><br>Rho-associated, coiled-coil containing protein kinase (ROCK) inhibitor                                         | 5 $\mu$ M; Cayman Chemical 10005583                                   |
| <i>GM6001</i><br>Matrix metalloprotease (MMP) inhibitor                                                                          | 0.2; 0.5; 25 nM; Sigma CC1000                                         |
| <i>SB202190 + A83-01</i><br>P38 MAPK inhibitor + TGF $\beta$ kinase/activin receptor-like kinase (ALK 5) inhibitor               | 500 nM; 500 nM; Sigma S7067; Tocris 2939                              |
| <i>SB202190 + A83-01 + noggin</i><br>P38 MAPK inhibitor + TGF $\beta$ ALK inhibitor + Bone Morphogenetic Protein (BMP) Inhibitor | 500 nM; 500 nM; 100 ng/ml Sigma S7067; Tocris 2939; Peprotech 120-10c |

## References:

1. Neuberger, T., Burton, B., Clark, H. & Van Goor, F. Use of primary cultures of human bronchial epithelial cells isolated from cystic fibrosis patients for the pre-clinical testing of CFTR modulators. *Methods Mol Biol* **741**, 39–54 (2011).
2. Sachs, N. *et al.* Long-term expanding human airway organoids for disease modeling. *EMBO J* **38**, (2019).
